# Supplementary material for: Spoilage Potential of Contaminating Yeast Species Kluyveromyces marxianus, Pichia kudriavzevii and Torulaspora delbrueckii during Cold Storage of Skyr
Source: MDPI journal article supplement (doi:10.3390/foods11121776), 2022-06-16
Supplement: s1 [file s1]

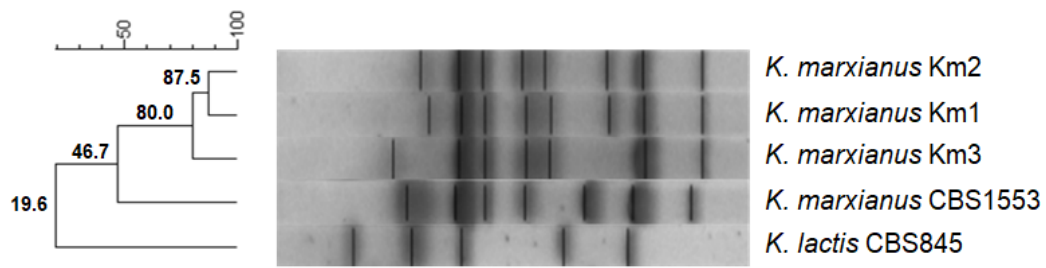

**Figure S1.** Dendrograms, showing clustering of *Kluyveromyces marxianus* Km1, Km2, Km3 and the type strains of *Kluyveromyces marxianus* CBS1553 and *Kluyveromyces lactis* CBS845. The chromosome length polymorphism of the yeast strains was analysed by pulsed-field gel electrophoresis. Clustering of the chromosomal profiles was performed using the unweighted pair group method with arithmetic averages algorithm and the Dice's coefficient of similarity.

**Table S1.** Concentration of volatile compounds (VOC) in skyr after 7 days incubation of yeasts *Kluyveromyces marxianus* Km1, Km2 and Km3, *Pichia kudriavzevii* Pk1 and *Torulaspora delbrueckii* Td1, and in skyr controls (without added yeasts).

| Compound              | VOC at Day 7, $\mu\text{g}\cdot\text{kg}^{-1}$ |                               |                              |                               |                               |                               |
|-----------------------|------------------------------------------------|-------------------------------|------------------------------|-------------------------------|-------------------------------|-------------------------------|
|                       | Control                                        | <i>K. marxianus</i> Km1       | <i>K. marxianus</i> Km2      | <i>K. marxianus</i> Km3       | <i>P. kudriavzevii</i> Pk1    | <i>T. delbrueckii</i> Td1     |
| <b>Alcohols</b>       |                                                |                               |                              |                               |                               |                               |
| 1-Butanol             | 46 $\pm$ 2.8 <sup>A</sup>                      | 30 $\pm$ 2.1 <sup>B</sup>     | 29 $\pm$ 4.1 <sup>B</sup>    | 28 $\pm$ 0.76 <sup>B</sup>    | 30 $\pm$ 0.07 <sup>B</sup>    | 30 $\pm$ 2.5 <sup>B</sup>     |
| 2-Butanol             | 1.8 $\pm$ 0.18 <sup>B</sup>                    | 2.7 $\pm$ 0.26 <sup>B</sup>   | 2.8 $\pm$ 0.82 <sup>B</sup>  | 2.5 $\pm$ 0.31 <sup>B</sup>   | 13 $\pm$ 3.1 <sup>A</sup>     | 1.9 $\pm$ 0.18 <sup>B</sup>   |
| 1-Hexanol             | 2.4 $\pm$ 0.42 <sup>C</sup>                    | 11 $\pm$ 1.5 <sup>AB</sup>    | 16 $\pm$ 4.0 <sup>A</sup>    | 12 $\pm$ 2.2 <sup>A</sup>     | 5.1 $\pm$ 0.33 <sup>BC</sup>  | 4.3 $\pm$ 0.65 <sup>C</sup>   |
| 3-Methyl-1-butanol    | 22 $\pm$ 3.4 <sup>C</sup>                      | 701 $\pm$ 82 <sup>AB</sup>    | 905 $\pm$ 111 <sup>A</sup>   | 553 $\pm$ 57 <sup>B</sup>     | 127 $\pm$ 24 <sup>C</sup>     | 22 $\pm$ 7.6 <sup>C</sup>     |
| 3-Methyl-3-buten-1-ol | 20 $\pm$ 2.5                                   | 21 $\pm$ 0.94                 | 22 $\pm$ 2.3                 | 22 $\pm$ 0.61                 | 24 $\pm$ 0.46                 | 20 $\pm$ 1.7                  |
| 2-Methyl-1-propanol   | 1.1 $\pm$ 0.15 <sup>C</sup>                    | 60 $\pm$ 15 <sup>AB</sup>     | 93 $\pm$ 30 <sup>A</sup>     | 31 $\pm$ 5.9 <sup>BC</sup>    | 11 $\pm$ 3.1 <sup>C</sup>     | 0.58 $\pm$ 0.15 <sup>C</sup>  |
| 1-Pentanol            | 8.2 $\pm$ 1.2 <sup>B</sup>                     | 13 $\pm$ 0.53 <sup>A</sup>    | 14 $\pm$ 0.92 <sup>A</sup>   | 12 $\pm$ 0.38 <sup>A</sup>    | 10 $\pm$ 0.24 <sup>B</sup>    | 7.7 $\pm$ 1.8 <sup>B</sup>    |
| 1-Penten-3-ol         | 0.26 $\pm$ 0.03 <sup>C</sup>                   | 1.4 $\pm$ 0.18 <sup>A</sup>   | 1.4 $\pm$ 0.17 <sup>A</sup>  | 1.4 $\pm$ 0.23 <sup>A</sup>   | 0.87 $\pm$ 0.09 <sup>B</sup>  | 0.46 $\pm$ 0.14 <sup>BC</sup> |
| 2-Phenylethanol       | 0.04 $\pm$ 0.05 <sup>B</sup>                   | 0.44 $\pm$ 0.22 <sup>AB</sup> | 0.65 $\pm$ 0.14 <sup>A</sup> | 0.24 $\pm$ 0.10 <sup>AB</sup> | 0.34 $\pm$ 0.08 <sup>AB</sup> | 0.11 $\pm$ 0.16 <sup>B</sup>  |
| 1-Propanol            | 0.38 $\pm$ 0.05 <sup>C</sup>                   | 6.5 $\pm$ 0.84 <sup>A</sup>   | 7.3 $\pm$ 1.2 <sup>A</sup>   | 3.7 $\pm$ 0.35 <sup>B</sup>   | 0.49 $\pm$ 0.10 <sup>C</sup>  | 0.35 $\pm$ 0.07 <sup>C</sup>  |
| 2-Propanol            | 1.2 $\pm$ 0.07 <sup>B</sup>                    | 1.5 $\pm$ 0.43 <sup>AB</sup>  | 1.04 $\pm$ 0.10 <sup>B</sup> | 1.03 $\pm$ 0.14 <sup>B</sup>  | 3.1 $\pm$ 1.1 <sup>A</sup>    | 0.70 $\pm$ 0.18 <sup>B</sup>  |
| 1-Octanol             | 3.8 $\pm$ 0.64 <sup>B</sup>                    | 8.5 $\pm$ 0.56 <sup>A</sup>   | 8.8 $\pm$ 1.3 <sup>A</sup>   | 8.5 $\pm$ 0.61 <sup>A</sup>   | 5.6 $\pm$ 0.29 <sup>B</sup>   | 4.5 $\pm$ 1.1 <sup>B</sup>    |
| <b>Aldehydes</b>      |                                                |                               |                              |                               |                               |                               |
| Butanal               | 1.1 $\pm$ 0.11 <sup>B</sup>                    | 2.3 $\pm$ 0.39 <sup>A</sup>   | 2.2 $\pm$ 0.26 <sup>A</sup>  | 1.8 $\pm$ 0.11 <sup>A</sup>   | 0.58 $\pm$ 0.06 <sup>B</sup>  | 0.46 $\pm$ 0.12 <sup>B</sup>  |
| Heptanal              | 2.4 $\pm$ 0.19 <sup>AB</sup>                   | 3.7 $\pm$ 0.60 <sup>A</sup>   | 3.9 $\pm$ 0.32 <sup>A</sup>  | 2.6 $\pm$ 0.52 <sup>AB</sup>  | 1.9 $\pm$ 0.20 <sup>B</sup>   | 1.6 $\pm$ 0.83 <sup>B</sup>   |
| Hexanal               | 1.7 $\pm$ 0.26 <sup>BC</sup>                   | 4.2 $\pm$ 0.73 <sup>AB</sup>  | 5.5 $\pm$ 0.78 <sup>A</sup>  | 3.4 $\pm$ 1.1 <sup>ABC</sup>  | 1.2 $\pm$ 0.19 <sup>C</sup>   | 1.1 $\pm$ 0.87 <sup>C</sup>   |
| 2-Methylbutanal       | 2.8 $\pm$ 0.16 <sup>C</sup>                    | 283 $\pm$ 6.1 <sup>A</sup>    | 239 $\pm$ 17 <sup>B</sup>    | 236 $\pm$ 20 <sup>B</sup>     | 1.3 $\pm$ 0.07 <sup>C</sup>   | 2.8 $\pm$ 0.15 <sup>C</sup>   |
| 3-Methylbutanal       | 4.2 $\pm$ 0.26 <sup>D</sup>                    | 128 $\pm$ 11 <sup>AB</sup>    | 101 $\pm$ 16 <sup>B</sup>    | 150 $\pm$ 20 <sup>A</sup>     | 36 $\pm$ 3.3 <sup>C</sup>     | 3.6 $\pm$ 0.52 <sup>D</sup>   |
| 3-Methyl-2-butenal    | 3.6 $\pm$ 0.07 <sup>B</sup>                    | 4.7 $\pm$ 0.39 <sup>A</sup>   | 4.9 $\pm$ 0.21 <sup>A</sup>  | 4.7 $\pm$ 0.04 <sup>A</sup>   | 3.6 $\pm$ 0.09 <sup>B</sup>   | 3.2 $\pm$ 0.54 <sup>B</sup>   |
| 2-Methylpropanal      | 5.02 $\pm$ 0.21 <sup>C</sup>                   | 231 $\pm$ 7.8 <sup>A</sup>    | 229 $\pm$ 8.3 <sup>A</sup>   | 156 $\pm$ 11 <sup>B</sup>     | 5.4 $\pm$ 0.25 <sup>C</sup>   | 4.9 $\pm$ 0.33 <sup>C</sup>   |
| Trans-2-Decenal       | 2.2 $\pm$ 0.38 <sup>C</sup>                    | 11 $\pm$ 2.7 <sup>A</sup>     | 10 $\pm$ 4.1 <sup>AB</sup>   | 7.9 $\pm$ 1.3 <sup>ABC</sup>  | 3.5 $\pm$ 0.18 <sup>BC</sup>  | 3.6 $\pm$ 2.1 <sup>ABC</sup>  |
| <b>Esters</b>         |                                                |                               |                              |                               |                               |                               |
| Butyl acetate         | 0.57 $\pm$ 0.08 <sup>AB</sup>                  | 2.3 $\pm$ 1.01 <sup>AB</sup>  | 3.9 $\pm$ 1.9 <sup>A</sup>   | 1.7 $\pm$ 1.3 <sup>AB</sup>   | 0.40 $\pm$ 0.01 <sup>AB</sup> | 0.14 $\pm$ 0.06 <sup>B</sup>  |
| Ethyl acetate         | nd <sup>C</sup>                                | 316 $\pm$ 8.4 <sup>A</sup>    | 320 $\pm$ 11 <sup>A</sup>    | 296 $\pm$ 19 <sup>AB</sup>    | 279 $\pm$ 11 <sup>B</sup>     | nd <sup>C</sup>               |
| Ethyl butyrate        | 0.95 $\pm$ 0.07 <sup>C</sup>                   | 4.1 $\pm$ 0.81 <sup>B</sup>   | 6.3 $\pm$ 1.2 <sup>A</sup>   | 2.7 $\pm$ 0.48 <sup>BC</sup>  | 1.03 $\pm$ 0.13 <sup>C</sup>  | 0.54 $\pm$ 0.08 <sup>C</sup>  |
| Ethyl hexanoate       | 0.05 $\pm$ 0.02                                | 0.05 $\pm$ 0.07               | 0.39 $\pm$ 0.30              | 0.09 $\pm$ 0.08               | nd                            | 0.04 $\pm$ 0.01               |

|                        |                           |                           |                          |                           |                           |                          |
|------------------------|---------------------------|---------------------------|--------------------------|---------------------------|---------------------------|--------------------------|
| Ethyl octanoate        | nd <sup>B</sup>           | 0.25 ± 0.12 <sup>AB</sup> | 0.33 ± 0.14 <sup>A</sup> | 0.17 ± 0.06 <sup>AB</sup> | nd <sup>B</sup>           | 0.04 ± 0.08 <sup>B</sup> |
| Ethyl formate          | nd <sup>C</sup>           | 1.62 ± 0.18 <sup>A</sup>  | 2.04 ± 0.30 <sup>A</sup> | 1.01 ± 0.14 <sup>B</sup>  | 0.32 ± 0.03 <sup>C</sup>  | 0.28 ± 0.08 <sup>C</sup> |
| Ethyl lactate          | 0.05 ± 0.06 <sup>B</sup>  | 0.50 ± 0.08 <sup>AB</sup> | 1.01 ± 0.39 <sup>A</sup> | 0.46 ± 0.07 <sup>AB</sup> | 0.27 ± 0.02 <sup>B</sup>  | 0.27 ± 0.01 <sup>B</sup> |
| Ethyl propionate       | nd <sup>B</sup>           | 0.58 ± 0.35 <sup>AB</sup> | 1.1 ± 0.70 <sup>A</sup>  | 0.02 ± 0.03 <sup>B</sup>  | 0.12 ± 0.02 <sup>AB</sup> | nd <sup>B</sup>          |
| Hexyl acetate          | 0.19 ± 0.02 <sup>AB</sup> | 0.25 ± 0.09 <sup>AB</sup> | 0.39 ± 0.12 <sup>A</sup> | 0.24 ± 0.06 <sup>AB</sup> | 0.13 ± 0.01 <sup>B</sup>  | 0.13 ± 0.01 <sup>B</sup> |
| 2-Methylpropyl acetate | 1.8 ± 0.34                | 0.89 ± 0.68               | 1.4 ± 0.95               | 0.46 ± 0.42               | 0.82 ± 0.23               | 0.91 ± 0.33              |
| 3-Methylbutyl acetate  | 0.10 ± 0.03 <sup>B</sup>  | 9.3 ± 6.1 <sup>A</sup>    | 17 ± 9.4 <sup>A</sup>    | 5.9 ± 4.8 <sup>AB</sup>   | 0.24 ± 0.02 <sup>B</sup>  | 0.13 ± 0.01 <sup>B</sup> |
| 4-Pentenyl acetate     | 0.15 ± 0.01 <sup>B</sup>  | 2.5 ± 0.27 <sup>AB</sup>  | 5.8 ± 2.8 <sup>A</sup>   | 1.1 ± 0.20 <sup>AB</sup>  | 0.21 ± 0.01 <sup>B</sup>  | 0.19 ± 0.01 <sup>B</sup> |
| Pentyl acetate         | 0.54 ± 0.06               | 0.64 ± 0.17               | 0.78 ± 0.28              | 0.49 ± 0.20               | 0.38 ± 0.02               | 0.28 ± 0.04              |
| 2-Phenylethyl acetate  | 0.04 ± 0.01 <sup>AB</sup> | 0.27 ± 0.13 <sup>AB</sup> | 0.47 ± 0.26 <sup>A</sup> | 0.12 ± 0.14 <sup>AB</sup> | 0.02 ± 0.02 <sup>B</sup>  | 0.01 ± 0.01 <sup>B</sup> |
| <b>Ketones</b>         |                           |                           |                          |                           |                           |                          |
| 2,3-Butanedione        | 512 ± 41 <sup>A</sup>     | 125 ± 19 <sup>C</sup>     | 130 ± 13 <sup>C</sup>    | 173 ± 43 <sup>C</sup>     | 381 ± 39 <sup>B</sup>     | 392 ± 39 <sup>B</sup>    |
| 2-Butanone             | 169 ± 12                  | 191 ± 10                  | 169 ± 22                 | 181 ± 14                  | 154 ± 2.0                 | 168 ± 16                 |
| 2-Heptanone            | 53 ± 1.1 <sup>B</sup>     | 57 ± 1.2 <sup>A</sup>     | 57 ± 1.7 <sup>A</sup>    | 55 ± 0.38 <sup>AB</sup>   | 53 ± 0.74 <sup>B</sup>    | 51 ± 5.9                 |
| 3-Hydroxy-2-butanone   | 149 ± 26                  | 163 ± 11                  | 161 ± 28                 | 178 ± 13                  | 191 ± 11                  | 182 ± 11                 |
| 2-Nonanone             | 6.3 ± 1.1 <sup>AB</sup>   | 13 ± 3.7 <sup>A</sup>     | 11 ± 3.1 <sup>A</sup>    | 7.3 ± 0.44 <sup>AB</sup>  | 3.4 ± 0.47 <sup>B</sup>   | 2.9 ± 0.41 <sup>B</sup>  |
| 2-Propanone            | 112 ± 3.5                 | 92 ± 18                   | 76 ± 4.5                 | 92 ± 1.6                  | 83 ± 11                   | 83 ± 13                  |

<sup>1</sup> Relative abundance of each compound was calculated from ratio of the peak area to that of the internal standard (4-methyl-1-pentanol). Different subscripts denote statistically different values (p < 0.05) within a row determined by the one-way ANOVA (Tukey's post-hoc analysis).

**Table S2.** Concentration of volatile compounds (VOC) in skyr after 14 days incubation of yeasts *Kluyveromyces marxianus* Km1, Km2 and Km3, *Pichia kudriavzevii* Pk1 and *Torulaspora delbrueckii* Td1, and in skyr controls (without added yeasts).

| Compound              | VOC at Day 14, $\mu\text{g}\cdot\text{kg}^{-1}$ |                         |                         |                         |                            |                           |
|-----------------------|-------------------------------------------------|-------------------------|-------------------------|-------------------------|----------------------------|---------------------------|
|                       | Control                                         | <i>K. marxianus</i> Km1 | <i>K. marxianus</i> Km2 | <i>K. marxianus</i> Km3 | <i>P. kudriavzevii</i> Pk1 | <i>T. delbrueckii</i> Td1 |
| <b>Alcohols</b>       |                                                 |                         |                         |                         |                            |                           |
| 1-Butanol             | $38 \pm 2.4^A$                                  | $24. \pm 3.1^B$         | $23 \pm 2.5^B$          | $24 \pm 1.2^B$          | $18 \pm 1.9^B$             | $21 \pm 2.1^B$            |
| 2-Butanol             | $1.4 \pm 0.08^C$                                | $11 \pm 3.1^B$          | $15 \pm 0.39^B$         | $10 \pm 1.9^B$          | $31 \pm 1.7^A$             | $1.3 \pm 0.15^C$          |
| 1-Hexanol             | $4.4 \pm 0.32^B$                                | $39 \pm 1.6^A$          | $36 \pm 2.6^A$          | $36 \pm 0.89^A$         | $5.9 \pm 1.1^B$            | $4.02 \pm 0.15^B$         |
| 3-Methyl-1-butanol    | $17 \pm 0.18^C$                                 | $1522 \pm 53^A$         | $1669 \pm 116^A$        | $1610 \pm 164^A$        | $374 \pm 9.1^B$            | $32 \pm 2.7$              |
| 3-Methyl-3-buten-1-ol | $29 \pm 0.61^A$                                 | $26 \pm 0.44^{AB}$      | $24 \pm 0.26^B$         | $26 \pm 0.95^{AB}$      | $26 \pm 0.76^{AB}$         | $24 \pm 2.1^B$            |
| 2-Methyl-1-propanol   | $0.73 \pm 0.08^B$                               | $417 \pm 66^A$          | $482 \pm 34^A$          | $455 \pm 45^A$          | $45 \pm 16^B$              | $1.1 \pm 0.10^B$          |
| 1-Pentanol            | $7.3 \pm 0.56^B$                                | $20 \pm 0.68^A$         | $19 \pm 0.38^A$         | $20 \pm 2.1^A$          | $9.5 \pm 0.73^B$           | $7.5 \pm 0.79^B$          |
| 1-Penten-3-ol         | $0.26 \pm 0.02^C$                               | $2.1 \pm 0.43^A$        | $1.6 \pm 0.16^{AB}$     | $1.9 \pm 0.35^A$        | $1.4 \pm 0.14^{AB}$        | $0.79 \pm 0.28^{BC}$      |
| 2-Phenylethanol       | $0.18 \pm 0.16^B$                               | $1.9 \pm 0.88^A$        | $1.5 \pm 0.16^{AB}$     | $1.3 \pm 0.21^{AB}$     | $0.87 \pm 0.41^{AB}$       | $0.39 \pm 0.32^B$         |
| 1-Propanol            | $0.28 \pm 0.10^B$                               | $15 \pm 6.9^A$          | $21 \pm 2.9^A$          | $19 \pm 8.1^A$          | $0.92 \pm 0.23^B$          | $0.30 \pm 0.06^B$         |
| 2-Propanol            | $0.85 \pm 0.48^B$                               | $3.3 \pm 2.2^B$         | $3.3 \pm 1.2^B$         | $2.5 \pm 0.34^B$        | $8.3 \pm 0.37^A$           | $0.58 \pm 0.05^B$         |
| 1-Octanol             | $4.5 \pm 0.51^B$                                | $18 \pm 2.3^A$          | $15 \pm 0.88^A$         | $14 \pm 0.48^A$         | $6.2 \pm 0.71^B$           | $4.2 \pm 0.30^B$          |
| <b>Aldehydes</b>      |                                                 |                         |                         |                         |                            |                           |
| Butanal               | $0.44 \pm 0.08$                                 | $0.92 \pm 0.41$         | $0.88 \pm 0.23$         | $0.81 \pm 0.17$         | $0.50 \pm 0.13$            | $0.35 \pm 0.12$           |
| Heptanal              | $1.7 \pm 0.14^{AB}$                             | $1.8 \pm 0.28^{AB}$     | $1.9 \pm 0.31^A$        | $1.7 \pm 0.14^{ABC}$    | $1.1 \pm 0.23^{BC}$        | $0.98 \pm 0.12^C$         |
| Hexanal               | $1.1 \pm 0.11^{AB}$                             | $2.6 \pm 0.95^{AB}$     | $2.9 \pm 1.2^A$         | $2.6 \pm 0.45^{AB}$     | $1.03 \pm 0.34^{AB}$       | $0.56 \pm 0.06^B$         |
| 2-Methylbutanal       | $2.3 \pm 0.10^{BC}$                             | $19 \pm 6.1^A$          | $16 \pm 4.6^{AB}$       | $28 \pm 8.1^A$          | $0.58 \pm 0.41^C$          | $2.5 \pm 0.12^{BC}$       |
| 3-Methylbutanal       | $3.2 \pm 0.19^B$                                | $14 \pm 1.9^A$          | $13 \pm 2.0^A$          | $17 \pm 3.3^A$          | $16 \pm 1.6^A$             | $4.04 \pm 0.24^B$         |
| 3-Methyl-2-butenal    | $2.7 \pm 0.09^A$                                | $2.2 \pm 0.16^{BC}$     | $1.9 \pm 0.22^C$        | $2.0 \pm 0.17^C$        | $2.6 \pm 0.08^{AB}$        | $2.03 \pm 0.14^C$         |
| 2-Methylpropanal      | $4.4 \pm 0.25^B$                                | $35 \pm 15^{AB}$        | $32 \pm 14^{AB}$        | $57 \pm 18^A$           | $5.7 \pm 0.47^B$           | $5.1 \pm 0.23^B$          |
| Trans-2-Decenal       | $1.8 \pm 0.78^B$                                | $9.3 \pm 4.3^A$         | $6.9 \pm 0.54^{AB}$     | $6.8 \pm 1.5^{AB}$      | $2.8 \pm 1.1^B$            | $3.2 \pm 1.3^B$           |
| <b>Esters</b>         |                                                 |                         |                         |                         |                            |                           |
| Butyl acetate         | $0.57 \pm 0.12^B$                               | $1.8 \pm 1.5^{AB}$      | $4.9 \pm 1.5^A$         | $2.2 \pm 2.1^{AB}$      | $0.95 \pm 0.41^{AB}$       | $0.10 \pm 0.01^B$         |
| Ethyl acetate         | nd <sup>B</sup>                                 | $306 \pm 16^A$          | $317 \pm 16^A$          | $296 \pm 3.9^A$         | $311 \pm 12^A$             | nd <sup>B</sup>           |
| Ethyl butyrate        | $1.03 \pm 0.16^B$                               | $27 \pm 3.8^A$          | $38 \pm 7.2^A$          | $26 \pm 9.8^A$          | $1.8 \pm 0.45^B$           | $0.50 \pm 0.02^B$         |
| Ethyl hexanoate       | $0.06 \pm 0.01^B$                               | $8.2 \pm 2.2^{AB}$      | $12 \pm 5.3^A$          | $7.6 \pm 4.2^{AB}$      | $0.01 \pm 0.02^B$          | $0.04 \pm 0.01^B$         |

|                        |                          |                           |                         |                           |                          |                          |
|------------------------|--------------------------|---------------------------|-------------------------|---------------------------|--------------------------|--------------------------|
| Ethyl octanoate        | nd <sup>B</sup>          | 8.5 ± 6.5 <sup>A</sup>    | 21 ± 11 <sup>A</sup>    | 4.5 ± 2.2 <sup>A</sup>    | nd <sup>B</sup>          | nd <sup>B</sup>          |
| Ethyl formate          | 0.33 ± 0.02 <sup>B</sup> | 6.4 ± 3.6 <sup>A</sup>    | 7.9 ± 0.75 <sup>A</sup> | 6.2 ± 1.1 <sup>A</sup>    | 0.52 ± 0.05 <sup>B</sup> | 0.34 ± 0.01 <sup>B</sup> |
| Ethyl lactate          | 0.25 ± 0.04 <sup>B</sup> | 9.4 ± 2.1 <sup>A</sup>    | 9.7 ± 1.2 <sup>A</sup>  | 7.9 ± 2.03 <sup>A</sup>   | 0.56 ± 0.31 <sup>B</sup> | 0.42 ± 0.04 <sup>B</sup> |
| Ethyl propionate       | nd <sup>B</sup>          | 1.8 ± 1.1 <sup>AB</sup>   | 6.7 ± 4.9 <sup>A</sup>  | 0.77 ± 0.46 <sup>AB</sup> | 4.3 ± 2.4 <sup>A</sup>   | nd <sup>B</sup>          |
| Hexyl acetate          | 0.17 ± 0.01 <sup>B</sup> | 0.77 ± 0.18 <sup>AB</sup> | 1.2 ± 0.40 <sup>A</sup> | 0.76 ± 0.40 <sup>AB</sup> | 0.20 ± 0.03 <sup>B</sup> | 0.15 ± 0.01 <sup>B</sup> |
| 2-Methylpropyl acetate | 2.3 ± 0.18               | 1.53 ± 1.02               | 5.5 ± 4.5               | 3.1 ± 3.4                 | 0.87 ± 0.57              | 0.73 ± 0.18              |
| 3-Methylbutyl acetate  | 0.05 ± 0.01 <sup>B</sup> | 18 ± 10 <sup>A</sup>      | 42 ± 23 <sup>A</sup>    | 26 ± 22 <sup>A</sup>      | 2.1 ± 1.1 <sup>AB</sup>  | 0.14 ± 0.01 <sup>B</sup> |
| 4-Pentenyl acetate     | 0.19 ± 0.01 <sup>B</sup> | 2.3 ± 1.2 <sup>AB</sup>   | 7.2 ± 2.5 <sup>A</sup>  | 1.1 ± 0.03 <sup>AB</sup>  | 0.24 ± 0.05 <sup>B</sup> | 0.07 ± 0.01 <sup>B</sup> |
| Pentyl acetate         | 0.60 ± 0.02              | 0.80 ± 0.24               | 1.3 ± 0.43              | 0.79 ± 0.44               | 0.47 ± 0.14              | 0.30 ± 0.01              |
| 2-Phenylethyl acetate  | 0.04 ± 0.01 <sup>B</sup> | 1.2 ± 0.44 <sup>AB</sup>  | 2.7 ± 1.6 <sup>A</sup>  | 1.3 ± 1.1 <sup>AB</sup>   | 0.07 ± 0.05 <sup>B</sup> | nd <sup>B</sup>          |
| <b>Ketones</b>         |                          |                           |                         |                           |                          |                          |
| 2,3-Butanedione        | 564 ± 14 <sup>A</sup>    | 67 ± 4.1 <sup>D</sup>     | 77 ± 11 <sup>D</sup>    | 71 ± 8.1 <sup>D</sup>     | 128 ± 12 <sup>C</sup>    | 351 ± 28 <sup>B</sup>    |
| 2-Butanone             | 117 ± 5.9                | 86 ± 21                   | 89 ± 31                 | 106 ± 26                  | 67 ± 5.2                 | 121 ± 15                 |
| 2-Heptanone            | 49 ± 0.96 <sup>B</sup>   | 53 ± 1.5 <sup>AB</sup>    | 52 ± 0.12 <sup>AB</sup> | 50 ± 0.53 <sup>AB</sup>   | 51 ± 1.1 <sup>AB</sup>   | 54 ± 2.9 <sup>A</sup>    |
| 3-Hydroxy-2-butanone   | 196 ± 11 <sup>A</sup>    | 123 ± 10 <sup>BC</sup>    | 111 ± 18 <sup>C</sup>   | 136 ± 16 <sup>BC</sup>    | 156 ± 10 <sup>ABC</sup>  | 162 ± 11                 |
| 2-Nonanone             | 1.26 ± 0.29 <sup>C</sup> | 21 ± 4.5 <sup>A</sup>     | 22 ± 5.2 <sup>A</sup>   | 17 ± 1.6 <sup>AB</sup>    | 8.6 ± 7.4 <sup>ABC</sup> | 3.2 ± 1.4 <sup>BC</sup>  |
| 2-Propanone            | 84 ± 32                  | 39 ± 19                   | 35 ± 15                 | 44 ± 13                   | 52 ± 5.01                | 75 ± 3.8                 |

<sup>1</sup> Relative abundance of each compound was calculated from ratio of the peak area to that of the internal standard (4-methyl-1-pentanol). Different subscripts denote statistically different values ( $p < 0.05$ ) within a raw determined by the one-way ANOVA (Tukey's post-hoc analysis).

**Table S3.** Fermentation and assimilation of lactose, glucose and galactose by yeasts *Kluyveromyces marxianus* Km1, Km2 and Km3, *Pichia kudriavzevii* Pk1 and *Torulaspora delbrueckii* Td1.

| Yeasts                     | Fermentation <sup>a</sup> |         |           | Assimilation <sup>b</sup> |         |           |
|----------------------------|---------------------------|---------|-----------|---------------------------|---------|-----------|
|                            | Lactose                   | Glucose | Galactose | Lactose                   | Glucose | Galactose |
| <i>K. marxianus</i> Km1    | +                         | +       | +         | +                         | +       | +         |
| <i>K. marxianus</i> Km2    | +                         | +       | +         | +                         | +       | +         |
| <i>K. marxianus</i> Km3    | +                         | +       | +         | +                         | +       | +         |
| <i>P. kudriavzevii</i> Pk1 | -                         | +       | -         | -                         | +       | -         |
| <i>T. delbrueckii</i> Td1  | -                         | +       | -         | -                         | +       | -         |

<sup>a</sup> Results are given as + (positive, Durham tube was filled with gas and pH was reduced) and – (negative, no production of air and no changes in pH).

<sup>b</sup> Results are given as + (positive, turbidity was observed as 2+ and 3+ on Wickerhams card), and – (negative, no growth)
